# Supplementary material for: Uncovering many-body correlations in nanoscale nuclear spin baths by central spin decoherence
Source: PubMed Central journal article supplement — Nat Commun. 2014 Sep 10;5:4822. doi: 10.1038/ncomms5822 (PMC4175593; doi:10.1038/ncomms5822), 2014-09-10
Supplement: ncomms5822-s1.pdf [file ncomms5822-s1.pdf]

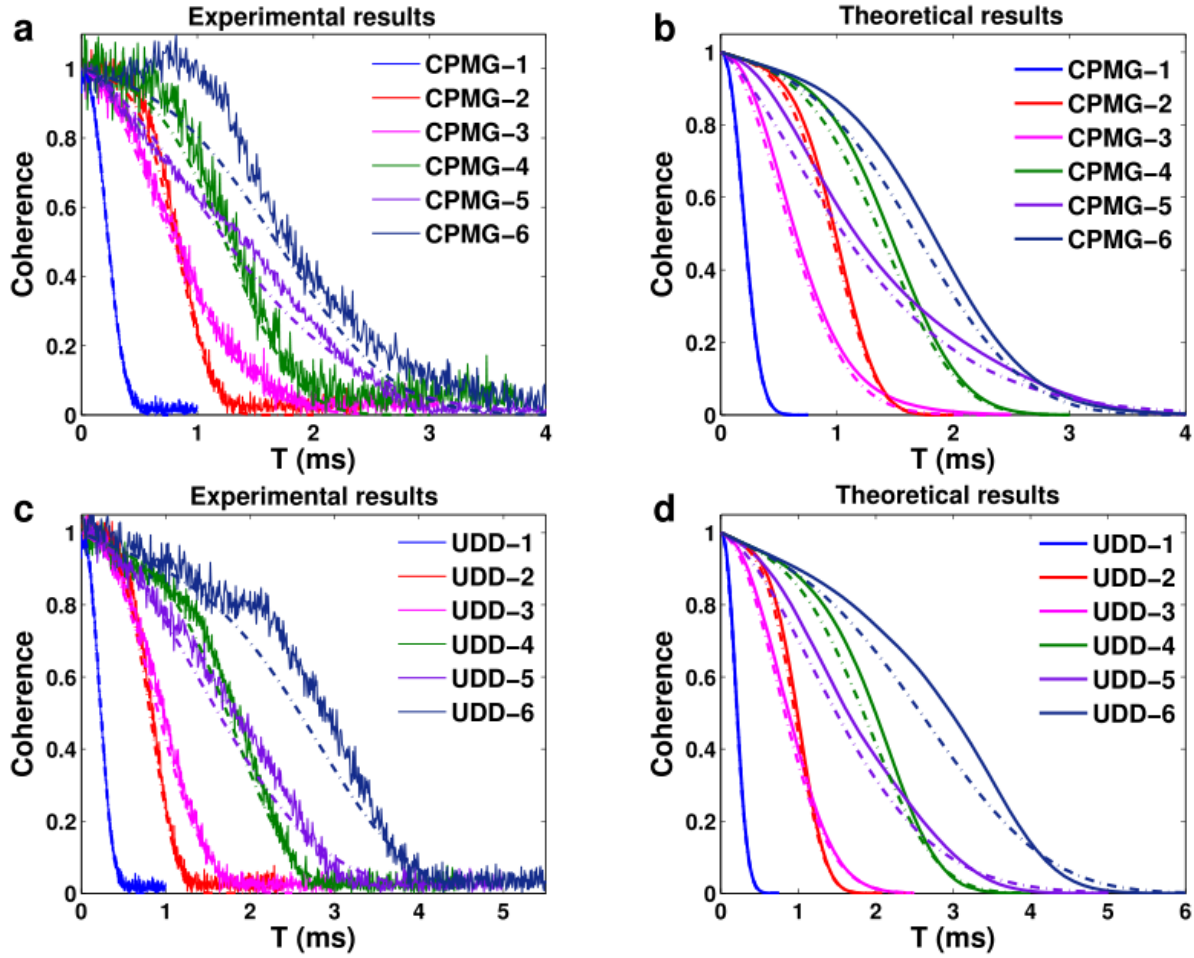

**Supplementary Figure 1 | Numerical fits of experimental and theoretical results of  $^{nat}\text{Si:P}$  electron spin decoherence by exponential functions  $\exp\left[-T/\tau_{\text{ID}} - (T/\tau_{\text{SD}})^2\right]$ . (a,c)**

Experimental or (b,d) theoretical (solid lines) and fitted (dashed lines) coherence of the P-donor electron spin in the natural  $^{29}\text{Si}$  nuclear spin bath under (a,b) CPMG or (c,d) UDD control. Here the same value of  $\tau_{\text{ID}} = 10$  ms was used in all the fits. We attribute the deviation seen at  $\sim 1$  ms for CPMG-6 to an overlap with uncorrected stimulated/unwanted echoes. The magnetic field was  $B = 0.3$  T applied along the [110] lattice direction.

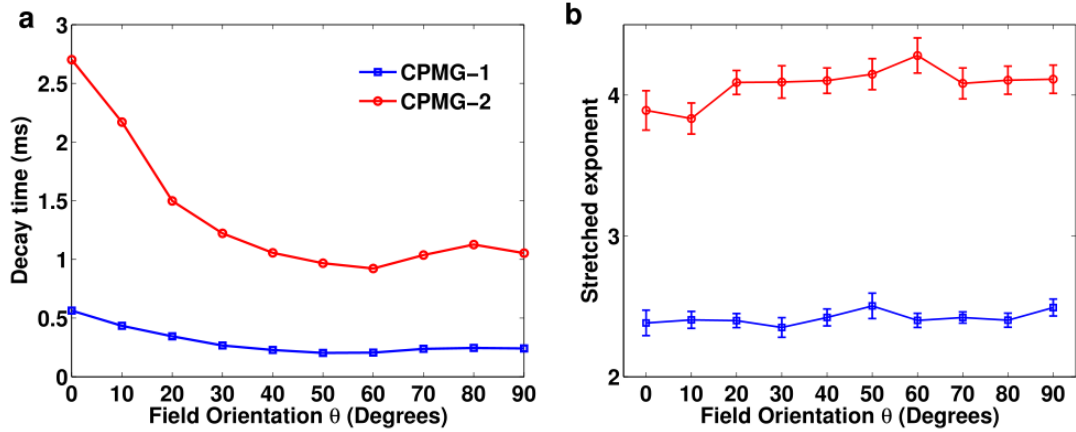

**Supplementary Figure 2 | Theoretical angular dependence of the decay time and stretching factor of central spin decoherence under dynamical decoupling.** (a) the decay time  $\tau_{SD}$  depends strongly on the field orientation. (b) the oscillations of the stretching factor  $\lambda$  with different field orientations are very small compared to the pulse number-parity oscillations. This implies that the pulse number-parity effect can be observed for any field direction. The crystal orientation is done in the [001]-[110] plane with the relations: [001] ( $\theta = 0^\circ$ ), [111] ( $\theta = 54.73^\circ$ ) and [110] ( $\theta = 90^\circ$ ). The error bars correspond to the systematic errors of the stretched exponential fitting of the time-domain spin decoherence.
